# Supplementary material for: Novel self-assembled natural graphite based composite anodes with improved kinetic properties in lithium-ion batteries
Source: Royal Society of Chemistry journal article supplement (doi:10.1039/c6ta02285e), 2016-01-01
Supplement: c6ta02285e1.pdf [file c6ta02285e1.pdf]

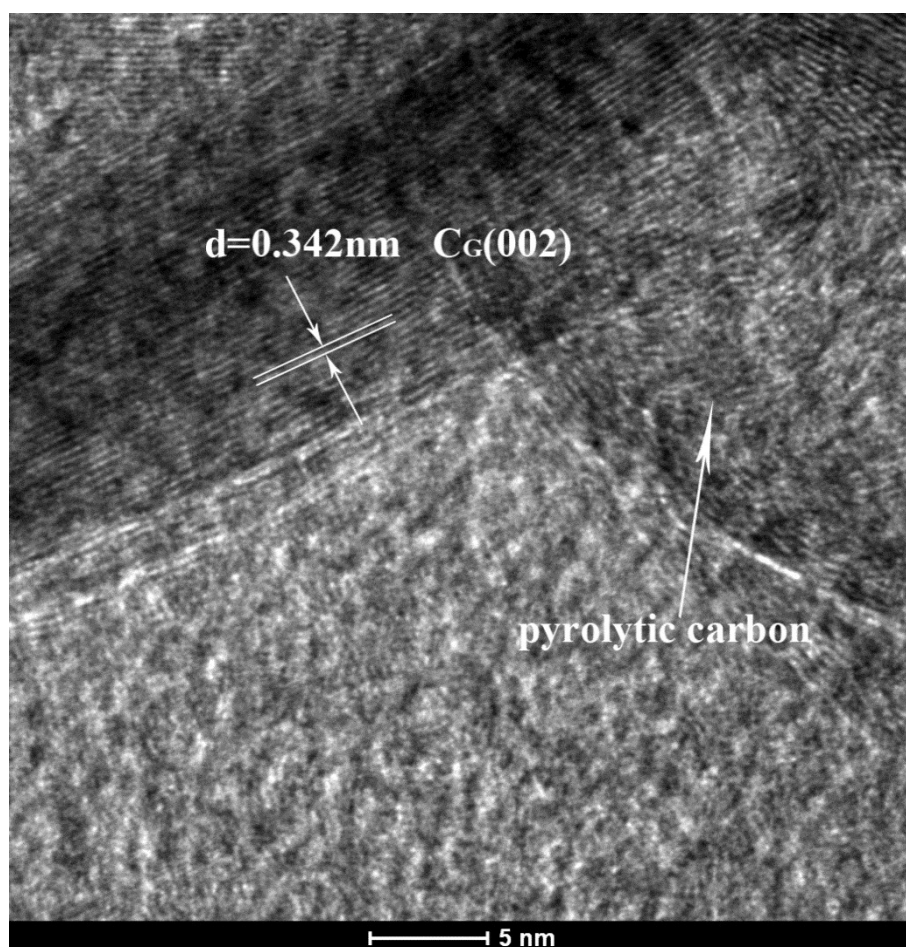

**Fig. S1** HRTEM image of the SANGs. It presents both the structure of graphite and pyrolytic carbon. The d-spacing value is 0.342 nm, which should be corresponding to the crystal lattice of graphite (002). The crystalline degree of the pyrolytic carbon is low.

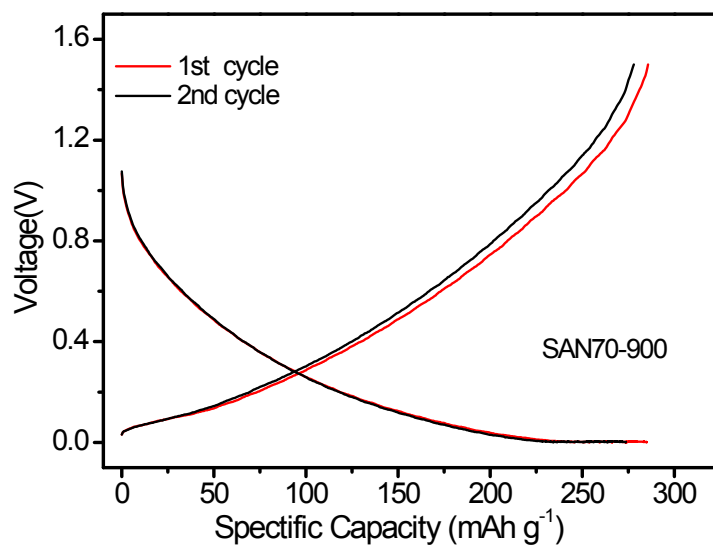

**Fig. S2** Voltage profiles of SAN70-900 electrode at the first two cycles (current density:  $100 \text{ mA g}^{-1}$ ).

**Table S1** Electrical resistivity of NG and SANGs films established by four point probe measurements.

| Sample                 | Electrical resistivity<br>( $\text{m}\Omega\cdot\text{cm}$ ) |
|------------------------|--------------------------------------------------------------|
| NG:PVDF (89/11 wt%)    | 6.2                                                          |
| SANGs:PVDF (89/11 wt%) | 28.4                                                         |
